# Supplementary material for: Soil organic matter diagenetic state informs boreal forest ecosystem feedbacks to climate change
Source: Copernicus journal article supplement (doi:10.5194/egusphere-2022-490), 2022-06-24
Supplement: Supplementary file 1 [file egusphere-2022-490-supplement.pdf]

**Supplemental**

**for**

**Soil organic matter diagenetic state informs boreal forest ecosystem feedbacks to climate change**

A. N. Myers-Pigg<sup>1\*</sup>, K. Kaiser<sup>2,3</sup>, R. Benner<sup>4</sup>, S. E. Ziegler<sup>1</sup>

<sup>1</sup> Department of Earth Sciences, Memorial University of Newfoundland, St. John's NL  
Canada

<sup>2</sup> Department of Marine Science, Texas A&M University, Galveston Campus, Galveston  
TX USA

<sup>3</sup> Department of Oceanography, Texas A&M University, College Station, TX USA

<sup>4</sup> Department of Biological Sciences and School of the Earth, Ocean and Environment,  
University of South Carolina, Columbia, SC USA

## Supplemental

Soil organic matter diagenetic state informs boreal forest ecosystem feedbacks to climate change  
Myers-Pigg, A.N., K. Kaiser, R. Benner, S. Ziegler

## Supplemental Methods

### *Composition of inputs*

Litterfall input materials were collected on an annual basis by placing litterfall traps on the forest floor within six plots across each of the nine study sites across the transect for known periods of time through the entire year in 2011-2015. Within one year (2011-2012), collected materials were sorted by material type (e.g. twigs, branches, needles, cones, etc.) and pooled by their yearly average weight percentage according to mass input within each plot throughout the year. These pooled samples were analyzed for elemental composition representative of the entire year. Total litterfall input composition was determined based on litterfall elemental data by type and the input mass of each material type (including mosses, woody material, etc.) on an annual basis and averaged over the 2011-2015 period. To obtain an estimate of total inputs to the surface of the soil profile, the chemistry of the litter input was adjusted to include moss inputs based upon the L layer characterization (see below).

### *L layer characterization*

Weight percentages of input components still identifiable in the L layer were determined through physical separation and weighing of separated components (eg. mosses, needles, twigs, etc). When complete isolation was not feasible, the percentage of components were determined through weight of the combined components and careful visual examination of their proportions. All procedures were completed by the same operator, and anything under 1% (w/w) was deemed undetectable.

### *End-member reconstruction*

Litterfall end-member phenolic composition was determined by weighing the influence of pure end-member sources (green and brown needles, woody materials such as cones, bark, twigs, etc.) according to the same yearly average weight percentage determined from the litterfall traps collections at each site from 2011-2012, to simulate likely input materials at each site on an annual basis. Twigs, branches, cones and bark were assumed to contain the same lignin content and composition as wood, while lichens were assumed to contain no lignin. When end-member sources were not directly measured for CuO lignin phenolic composition from pure end-member sources in this study (as brown and green needles were), literature values were used (Hedges and Mann 1979; Moingt et al. 2016). This was the case for both balsam fir woody materials, and for birch woody materials. All literature values of phenolic composition were converted to nmol mgC<sup>-1</sup>. When phenolic ratios were given in the literature, these values were converted directly to molar ratios; when not, these were calculated from V, S, P and C phenolic class concentrations in mg phenol gdw<sup>-1</sup> utilizing average ketone, acid and aldehyde distribution detailed in Ertel and Hedges (Ertel and Hedges 1984), and converted to molar quantities or ratios. Error was propagated from these estimates utilizing the ‘propagate’ package in R, which propagates uncertainty using higher-order Taylor expansion

## Supplemental

Soil organic matter diagenetic state informs boreal forest ecosystem feedbacks to climate change  
Myers-Pigg, A.N., K. Kaiser, R. Benner, S. Ziegler

(Andrej-Nikolai Spiess 2018). These phenolic modeled litterfall end-members were included in the development of the LPDI to better estimate soil input materials.

### *Tree productivity assessment*

Due to the crowded nature of the balsam fir forests in this mesic boreal region, we used rate of change in tree height as a measure of tree growth or productivity. This enabled us to largely eliminate the influence of stand dynamics, such as tree density, on the measurement of growth. Three representative trees within close proximity of each site in each of the three regions ( $n = 27$ ) were felled and measured. Total height of each tree was measured from stump cut at the root collar. Measurements from the top of the tree to the first node, branch nodes indicating the lateral buds that represent the end of the years growth, was made to obtain height growth for that past year. This was continued down the tree toward the stump wherever possible occasionally checking through sections in the field between visible nodes to be sure no nodes were missed due to any damage. Once these nodes were no longer distinguishable, sectioning at 1 m intervals was applied. To normalize these measures across sites and regions we focused only on the data collected from 3 m height so that we were able to assess productivity of trees in these stands after the point they were able to freely grow unimpeded by the canopy structure. The plot of the tree height versus age for all 27 trees measured were all consistent with free growth occurring well before 3 m height. The rate of growth in m per year was estimated from the relationship between tree height and age since each tree was 3 m tall. This was further averaged at the regional level, with standard deviation of site-level slope fits assessed at the regional level (Supplemental Table 6).

## Supplemental

Soil organic matter diagenetic state informs boreal forest ecosystem feedbacks to climate change  
Myers-Pigg, A.N., K. Kaiser, R. Benner, S. Ziegler

### Supplemental Figures and Tables

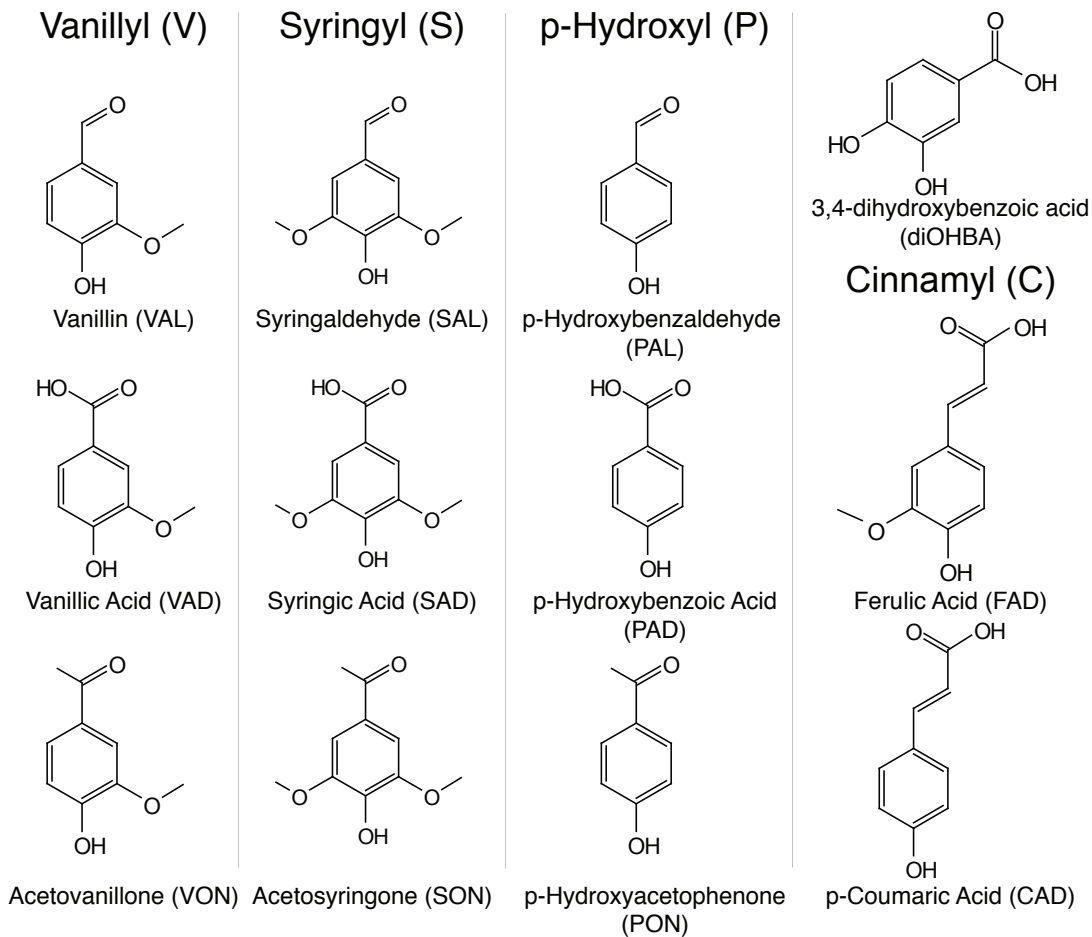

**Figure S1.** Twelve common CuO by-product phenols used to assess lignin composition and degradation state.

## Supplemental

Soil organic matter diagenetic state informs boreal forest ecosystem feedbacks to climate change  
Myers-Pigg, A.N., K. Kaiser, R. Benner, S. Ziegler

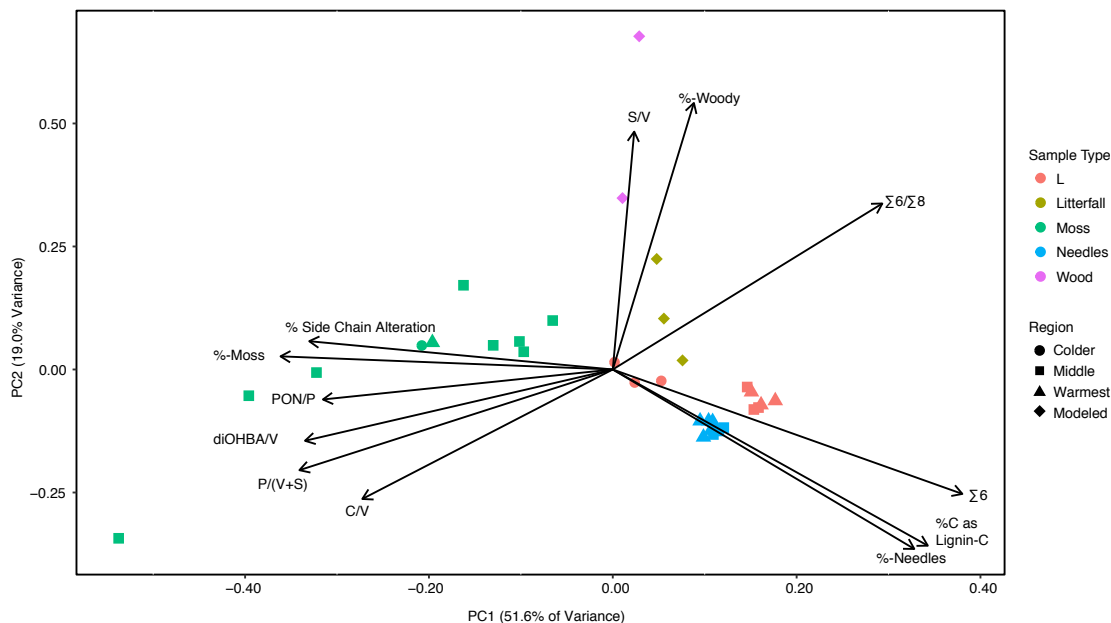

**Figure S2.** PCA bi-plot of source separations on the first two principle components, which cumulatively explain 70.6% of the variance in lignin phenol parameters, aimed to assess source influences on lignin content. Representative composite moss mixture samples included for the coldest and warmest site, while individual moss species were included for the middle site to illustrate the large heterogeneity in lignin content present among moss species found at these sites. Composite moss sample for middle site should be similar to the coldest site, as species composition are similar in these two forests (K. Buckeridge, pers. comm.). Needle signatures are obtained from litterfall needles from spring 2011, while litterfall signatures are modeled based on proportion of materials in litterfall traps from 2011-2012 (see supplemental methods above for details). Modeled wood input is also included (see supplemental methods above for how this was derived); expectedly the balsam fir wood endmember plots most similarly to the modeled litterfall samples and the sampled L layers, while the birch wood endmember plots uniquely. PC1 appears to differentiate between mosses and non-moss inputs, while PC2 appears to split between woody/non-woody inputs. Signatures apparently impacted by mosses include: PON/P, diOHBA/V, C/V. This is particularly interesting to note as diOHBA/V has been used to track soil inputs to aquatic systems, while C/V is generally used to differentiate between leafy and woody materials. %C as lignin-C appears to be driven by needle inputs in these systems and thus remains a relevant tracer of soil organic carbon to be tested.

**Table S1.** Common lignin phenol ratios and indicators of diagenesis and source.

| Phenolic Index                           | Description                                                                                                                                                                                                 | Classic interpretation                | Caveats                                                                                                                                                                                                       | References                                                                                  |
|------------------------------------------|-------------------------------------------------------------------------------------------------------------------------------------------------------------------------------------------------------------|---------------------------------------|---------------------------------------------------------------------------------------------------------------------------------------------------------------------------------------------------------------|---------------------------------------------------------------------------------------------|
| Acid/Aldehyde                            | Used to assess side chain oxidation of the lignin macromolecule (common acid/aldehyde ratios are: Vanillic Acid/Vanillin, $V_{ad/al}$ and Syringaldehyde/Syringic Acid, $S_{ad/al}$ ).                      | Increases with increasing degradation | Difference is solubilization, photo-reactivity between acids and aldehydes of different phenolic groups.                                                                                                      | Ertel and Hedges 1984; Feng and Simpson 2008                                                |
| Percentage Side Chain Alteration         | Used to determine the percentage of side chains in the lignin macromolecule which have been altered by degradation.                                                                                         | Increases with increasing degradation | Not commonly used across studies. Assumes side chains linkages that form aldehydes are converted to linkages which form acids with no change in efficiency.                                                   | Ertel and Hedges 1984                                                                       |
| $\Sigma 8$ (VSC)                         | The sum of C, S and V class phenols, used to determine lignin content.                                                                                                                                      | Decreases with increasing degradation | C phenol content varies dramatically in many herbaceous tissues and C class phenols are thought to be more reactive than V or S type phenols due to their ester linkages and associations with carbohydrates. | Hedges and Mann 1979; Hedges and Weliky 1989; Opsahl and Benner 1995; Otto and Simpson 2006 |
| $\Sigma 6$ (VS)                          | The sum of S and V class phenols used to determine lignin content.                                                                                                                                          | Decreases with increasing degradation | Commonly used in marine systems instead of $\Sigma 8$ , as C phenols derived from aromatic amino acids are higher in proportion than from lignin in such ecosystems.                                          | Hernes and Benner 2003                                                                      |
| Percentage C as Lignin C (%C-Lignin C)   | The percentage of carbon as lignin carbon is used to assess the total carbon that can be assigned to lignin from CuO oxidation, corrected for methodological efficiencies.                                  | Decreases with increasing degradation | Assuming uniform methodological efficiencies. Not commonly used in soil studies.                                                                                                                              | Hedges and Weliky 1989; Benner et al. 1990b                                                 |
| Ferulic Acid / p-Coumaric Acid (FAD/CAD) | FAD/CAD is used to assess diagenetic state of needle inputs, as CAD is produced in much greater quantities than FAD in gymnosperm needles, while CAD is lost more rapidly from gymnosperm needles than FAD. | Decreases with increasing degradation | CAD is also thought to be more water soluble than FAD.                                                                                                                                                        | Hedges and Weliky 1989; Sanger et al. 1997                                                  |

## Supplemental

Soil organic matter diagenetic state informs boreal forest ecosystem feedbacks to climate change

Myers-Pigg, A.N., K. Kaiser, R. Benner, S. Ziegler

| Phenolic Index                            | Description                                                                                                                                                                                                                                                      | Classic interpretation                                                                                         | Caveats                                                                                     | References                                                                              |
|-------------------------------------------|------------------------------------------------------------------------------------------------------------------------------------------------------------------------------------------------------------------------------------------------------------------|----------------------------------------------------------------------------------------------------------------|---------------------------------------------------------------------------------------------|-----------------------------------------------------------------------------------------|
| Dihydroxybenzoic acid/Vanillyl (diOHBA/V) | diOHBA is thought to be a by-product of tannin degradation                                                                                                                                                                                                       | Increases with increasing degradation                                                                          | Hydroxybenzene structures are also present in mosses, potentially influencing the diOHBA/V. | Wilson et al. 1989; Goñi and Hedges 1995; Houel et al. 2006                             |
| p-Hydroxyl/ (Vanillyl + Syringyl) P/(V+S) | Increases with increasing degradation of lignin, as p-hydroxyphenols are not affected by methoxy group loss during demethoxylation.                                                                                                                              | Decreases with increasing degradation                                                                          | Ratio is impacted by p-hydroxyphenol content in mosses.                                     | Hedges and Ertel 1982; Opsahl and Benner 1995; Williams et al. 1998; Moingt et al. 2016 |
| Cinnamyl/Vanillyl (C/V)                   | The ratio of the sum of cinnamyl phenols to the sum of vanillyl phenols. Non-woody materials contain higher C phenols than woody tissues, thus ratio is used to assess contribution of woody or non-woody materials                                              | Quality indicator; lower numbers more woody tissues, higher numbers more non-woody tissues                     | Impacted by varying reactivity between C and V phenol classes.                              | Hedges and Mann 1979                                                                    |
| Syringyl/Vanillyl (S/V)                   | Ratio of the sum of syringyl phenols to the sum of vanillyl phenols. Gymnosperms contain mainly V phenols, while angiosperms contain near equal mix of V and S phenols, thus ratio is used to assess major types of lignin sources; angiosperms and gymnosperms. | Quality indicator; lower numbers more influenced by gymnosperms, higher numbers more influenced by angiosperms | Also changes with degradation, as V and S type phenols have differing reactivity.           | Hedges and Mann 1979; Otto and Simpson 2006                                             |
| p-Hydroxyacetophenone/ p-Hydroxyl (PON/P) | PON/P has been used as a ratio of lignin vs non-lignin p-hydroxyphenol content, as PON is thought to be derived primarily from lignin content.                                                                                                                   | Increases with increasing contribution of lignin to p-hydroxyphenol content                                    | Hydroxyphenols have many non-lignin sources, such as aromatic amino acids and mosses.       | Williams et al. 1998; Goñi et al. 2000; Dittmar and Lara 2001                           |

**Supplemental**

Soil organic matter diagenetic state informs boreal forest ecosystem feedbacks to climate change

Myers-Pigg, A.N., K. Kaiser, R. Benner, S. Ziegler

**Table S2.** Output loadings on PCs 1 & 2 for source PCA model (Supplemental Figure 2).

| Variable                 | Loading on PC1 | Loading on PC2 |
|--------------------------|----------------|----------------|
| % Woody Material         | 0.08           | 0.52           |
| % Needles                | 0.31           | -0.35          |
| % Moss                   | -0.34          | 0.03           |
| $\Sigma 6 / \Sigma 8$    | 0.28           | 0.32           |
| $\Sigma 6$<br>(nmol/mgC) | 0.36           | -0.24          |
| S/V                      | 0.02           | 0.46           |
| C/V                      | -0.26          | -0.25          |
| PON/P                    | -0.30          | -0.06          |
| diOHBA/V                 | -0.32          | -0.14          |
| P/(V+S)                  | -0.32          | -0.19          |
| % C as Lignin-C          | 0.33           | -0.34          |
| % Side Chain Alteration  | -0.31          | 0.05           |



**Supplemental**

Soil organic matter diagenetic state informs boreal forest ecosystem feedbacks to climate change

Myers-Pigg, A.N., K. Kaiser, R. Benner, S. Ziegler

**Table S3.** Output scores on PCs 1 & 2 for Source PCA model presented in supplemental Figure 2.

| Sample Type | Region | Site                                            | Score on PC1 | Score on PC2 |
|-------------|--------|-------------------------------------------------|--------------|--------------|
| L           | Cold   | Site 1 - Plot 1                                 | 0.03         | 0.13         |
| L           | Cold   | Site 1 - Plot 2                                 | 0.75         | -0.20        |
| L           | Cold   | Site 1 - Plot 3                                 | 0.34         | -0.23        |
| L           | Cool   | Site 1- Plot 1                                  | 2.27         | -0.67        |
| L           | Cool   | Site 1- Plot 2                                  | 2.09         | -0.31        |
| L           | Cool   | Site 1- Plot 3                                  | 2.19         | -0.71        |
| L           | Warm   | Site 1- Plot 1                                  | 2.53         | -0.55        |
| L           | Warm   | Site 1- Plot 2                                  | 2.16         | -0.40        |
| L           | Warm   | Site 1- Plot 3                                  | 2.31         | -0.62        |
| Moss        | Cold   | Site 1-Composite Moss                           | -2.97        | 0.42         |
| Moss        | Cool   | Site 1-Brown <i>Dicranum majus</i>              | -0.93        | 0.86         |
| Moss        | Cool   | Site 1-Green <i>Dicranum majus</i>              | -2.32        | 1.49         |
| Moss        | Cool   | Site 1- Brown <i>Hylocomium splendens</i>       | -1.38        | 0.31         |
| Moss        | Cool   | Site 1- Brown <i>Hylocomium splendens</i>       | -1.86        | 0.43         |
| Moss        | Cool   | Site 1- Green <i>Hylocomium splendens</i>       | -5.66        | -0.46        |
| Moss        | Cool   | Site 1- Green <i>Hylocomium splendens</i>       | -4.61        | -0.05        |
| Moss        | Cool   | Site 1- Brown <i>Rhytidiadelphus triquetrus</i> | -1.45        | 0.49         |
| Moss        | Cool   | Site 1- Green <i>Rhytidiadelphus triquetrus</i> | -7.68        | -2.98        |
| Moss        | Warm   | Site 1-Composite Moss                           | -2.81        | 0.47         |
| Needles     | Cool   | Site 1- Brown Balsam fir                        | 1.62         | -1.08        |
| Needles     | Cool   | Site 1- Brown Balsam fir                        | 1.65         | -1.08        |
| Needles     | Cool   | Site 1- Green Balsam fir                        | 1.73         | -1.02        |
| Needles     | Cool   | Site 1- Green Balsam fir                        | 1.56         | -1.15        |

**Supplemental**

Soil organic matter diagenetic state informs boreal forest ecosystem feedbacks to climate change

Myers-Pigg, A.N., K. Kaiser, R. Benner, S. Ziegler

| Sample Type | Region       | Site                     | Score on PC1 | Score on PC2 |
|-------------|--------------|--------------------------|--------------|--------------|
| Needles     | Warm         | Site 1- Green Balsam fir | 1.53         | -1.07        |
| Needles     | Warm         | Site 1- Green Balsam fir | 1.36         | -0.91        |
| Needles     | Warm         | Site 1- Brown Balsam fir | 1.55         | -0.92        |
| Needles     | Warm         | Site 1- Brown Balsam fir | 1.49         | -0.91        |
| Needles     | Warm         | Site 1- Fresh Balsam fir | 1.41         | -1.19        |
| Wood        | Modeled      | Balsam Fir Literature    | 0.15         | 3.02         |
| Wood        | Modeled      | Birch Literature         | 0.41         | 5.88         |
| Litterfall  | Modeled-Cold | Site 1                   | 1.08         | 0.16         |
| Litterfall  | Modeled-Cool | Site 1                   | 0.79         | 0.90         |
| Litterfall  | Modeled-Warm | Site 1                   | 0.68         | 1.95         |

**Supplemental**

Soil organic matter diagenetic state informs boreal forest ecosystem feedbacks to climate change  
Myers-Pigg, A.N., K. Kaiser, R. Benner, S. Ziegler

**Table S4.** Output loadings on PC 1 for Lignin Phenol Degradation Index (LPDI). Variance explained by the first principle component was 64.3%.

| Variable             | Loading on PC1 |
|----------------------|----------------|
| $\Sigma 6/\Sigma 8$  | -0.57          |
| Ad/Al <sub>v</sub>   | 0.57           |
| FAD/CAD              | 0.27           |
| % Carbon as Lignin-C | -0.53          |

**Table S5.** Average tree growth for each region as determined through growth rate curves; these were determined at each of the three sites per region, with exception of the warmest site (\*), where one site was not included in this assessment. This was due to clear-cutting of the site before these measurements could be made.

| Region | Number of observations per site | Average Growth (m y <sup>-1</sup> ) | Standard Deviation |
|--------|---------------------------------|-------------------------------------|--------------------|
| Cold   | 3                               | 0.13                                | 0.02               |
| Cool   | 3                               | 0.16                                | 0.06               |
| Warm*  | 3                               | 0.26                                | 0.04               |

## Supplemental

Soil organic matter diagenetic state informs boreal forest ecosystem feedbacks to climate change  
Myers-Pigg, A.N., K. Kaiser, R. Benner, S. Ziegler

## Supplemental References

Andrej-Nikolai Spiess (2018) Package 'propagate' - Propagation of Uncertainty

Ertel, R., and Hedges, J. I.: The lignin component of humic substances: Distribution among soil and sedimentary humic, fulvic, and base-insoluble fractions, *Geochim. Cosmochim. Acta*, 48, 2065–2074, 1984.

Hedges, J. I., Mann, D. C.: The characterization of plant tissues by their lignin oxidation products, *Geochim. Cosmochim. Acta*, 43, 1803–1807, 1979.

Kohl, L., Philben, M., Edwards, K. A., Podrebarac, F. A., Warren, J., and Ziegler, S. E.: The origin of soil organic matter controls its composition and bioreactivity across a mesic boreal forest latitudinal gradient, *Glob. Chang. Biol.*, 24, e458–e473, <https://doi.org/10.1111/gcb.13887>, 2018.

Moingt, M., Lucotte, M., and Paquet, S.: Lignin biomarkers signatures of common plants and soils of Eastern Canada, *Biogeochemistry*, 129, 133–148, <https://doi.org/10.1007/s10533-016-0223-7>, 2016.

Xu, C., Singh, V.: Evaluation and generalization of temperature based methods for calculating evaporation, *Hydrol. Process.*, 319, 305–319, 2001.

Ziegler, S. E., Benner, R., Billings, S. A., Edwards, K. A., Philben, M., Zhu, X., and Laganière, J.: Climate Warming Can Accelerate Carbon Fluxes without Changing Soil Carbon Stocks, *Front. Earth Sci.*, 5, 1–12, <https://doi.org/10.3389/feart.2017.00002>, 2017.
